# Supplementary material
Source: PubMed Central journal article supplement (PMC9241364)
Supplement: NIHMS1812618-supplement-Supplementary_Table_1-4__File_1.pdf [file NIHMS1812618-supplement-Supplementary_Table_1-4__File_1.pdf]

**Supplementary Table 1: Primers and probes for common SARS-CoV-2 RT-qPCR diagnostic assays.**

| Institute | Target        | Primer/Probe   | Sequence                                              | Ref |
|-----------|---------------|----------------|-------------------------------------------------------|-----|
| Charité   | E             | E_Sarbeco_F    | ACAGGTACGTTAATAGTTAATAGCGT                            | 1   |
|           |               | E_Sarbeco_R    | ATATTGCAGCAGTACGCACACA                                |     |
|           |               | E_Sarbeco_P1   | FAM-ACACTAGCCATCCTTACTGCGCTTCG-BHQ1                   |     |
|           | RdRp          | RdRp_SARSr-F   | GTGARATGGTCATGTGTGGCGG                                |     |
|           |               | RdRp_SARSr-R   | CARATGTTAAAS <b>S</b> ACTATTAGCATA                    |     |
|           |               | RdRp_SARSr-P1  | FAM-CCAGGTGG <b>W</b> ACRTCATC <b>M</b> GGTGATGC-BHQ1 |     |
|           |               | RdRp_SARSr-P2  | FAM-CAGGTGGAACCTCATCAGGAGATGC-BHQ1                    |     |
| HKU       | N             | HKU-N-F        | TAATCAGACAAGGAAGTATTA                                 | 2   |
|           |               | HKU-N-R        | CGAAGGTGTGACTTCCATG                                   |     |
|           |               | HKU-N-P        | FAM-GCAAATTGTGCAATTTGCGG-BHQ1                         |     |
|           | nsp14         | HKU-ORF1-F     | TGGGGYTTTACRGGTAACCT                                  |     |
|           |               | HKU-ORF1-R     | AACRCGCTTAACAAAGCACTC                                 |     |
|           |               | HKU-ORF1-P     | FAM-TAGTTGTGATGC <b>W</b> ATCATGACTAG-BHQ1            |     |
| China CDC | N             | CCDC-N-F       | GGGGAAGTCTCCTGCTAGAAT                                 | 3   |
|           |               | CCDC-N-R       | CAGACATTTTGCTCTCAAGCTG                                |     |
|           |               | CCDC-N-P       | FAM-TTGCTGCTGCTTGACAGATT-BHQ1                         |     |
|           | nsp10         | CCDC-ORF1-F    | CCCTGTGGGTTTTACTTAA                                   |     |
|           |               | CCDC-ORF1-R    | ACGATTGTGCATCAGCTGA                                   |     |
|           |               | CCDC-ORF1-P    | FAM-CCGTCTGCGGTATGTGGAAAGTTATGG-BHQ1                  |     |
| US CDC    | N             | 2019-nCoV_N1-F | GACCCCAAATCAGCGAAAT                                   | 4   |
|           |               | 2019-nCoV_N1-R | TCTGGTACTGCCAGTTGAATCTG                               |     |
|           |               | 2019-nCoV_N1-P | FAM-ACCCCGCATTACGTTTGGTGGACC-BHQ1                     |     |
|           | N             | 2019-nCoV_N2-F | TTACAAACATTGGCCGCAA                                   |     |
|           |               | 2019-nCoV_N2-R | GCGCGACATTCCGAAGAA                                    |     |
|           |               | 2019-nCoV_N2-P | FAM-ACAATTTGCCCCAGCGCTTCTAG-BHQ1                      |     |
|           | N             | 2019-nCoV_N3-F | GGGAGCCTTGAATACACCAAAA                                |     |
|           |               | 2019-nCoV_N3-R | TGTAGCACGATTGCAGCATTG                                 |     |
|           |               | 2019-nCoV_N3-P | FAM-AYCACATTGGCACCCGCAATCCTG-BHQ1                     |     |
|           | Human RNase P | RP-F           | AGATTTGGACCTGCGAGCG                                   |     |
|           |               | RP-R           | GAGCGGCTGTCTCCACAAGT                                  |     |
|           |               | RP-P           | FAM-TTCTGACCTGAAGGCTCTGCGCG-BHQ1                      |     |

Degenerate nucleotides are shown in bold.

**Supplementary Table 2:** Primers for generation of T7 RNA transcript standards for SARS-CoV-2.

| <b>Target</b> | <b>Primer</b>  | <b>Sequence</b>                          |
|---------------|----------------|------------------------------------------|
| nsp10         | nsp10-Std-T7-F | TAATACGACTCACTATAGGGGTGGGGGACAACCAATCACT |
|               | nsp10-Std-R    | AGACGAGGTCTGCCATTGTG                     |
| RdRp          | RdRp-Std-T7-F  | TAATACGACTCACTATAGGGAATAGAGCTCGCACCGTAGC |
|               | RdRp-Std-R     | CATCTACAAAACAGCCGGCC                     |
| nsp14         | nsp14-Std-T7-F | TAATACGACTCACTATAGGGTAGTGCTAAACCACCGCCTG |
|               | nsp14-Std-R    | AACTGCCACCATCACAACCA                     |
| E             | E-Std-T7-F     | TAATACGACTCACTATAGGGGCGTGCCTTTGTAAGCACAA |
|               | E-Std-R        | GGCAGGTCCTTGATGTCACA                     |
| N             | N-Std-T7-F     | TAATACGACTCACTATAGGGGAATTGTGCGTGGATGAGGC |
|               | N-Std-R        | TGTCTCTGCGGTAAGGCTTG                     |

**Supplementary Table 3:** RNA transcript standards for common SARS-CoV-2 diagnostic assays (see genomic context on Figure 1a).

| Gene         | Length                     | Sequence                                                                                                                                                                                                                                                                                                                                                                                                                                                                                                                                                                                                                                                                                                                                                                                                                                                                                                                                                                                 |
|--------------|----------------------------|------------------------------------------------------------------------------------------------------------------------------------------------------------------------------------------------------------------------------------------------------------------------------------------------------------------------------------------------------------------------------------------------------------------------------------------------------------------------------------------------------------------------------------------------------------------------------------------------------------------------------------------------------------------------------------------------------------------------------------------------------------------------------------------------------------------------------------------------------------------------------------------------------------------------------------------------------------------------------------------|
| nsp10        | 704nt<br>(13,122 - 13,825) | GUGGGGGACAACCAAUCACUAAUUGUGUUAAGAUGUUGUGUACACACACUG<br>GUACUGGUCAGGCAAUACAGUUACACCGGAAGCCAAUUAUGGAUCAAGAAUC<br>CUUUGGUGGUGCAUCGUGUUGUCUGUACUGCCGUUGCCACAUAGAUAUCC<br>AAAUCCUAAAGGAUUUUUGUGACUUAAAAGGUAAGUAUGUACAAAUACCUACA<br>ACUUGUGCUAAUGACCCUGUGGGUUUJACACUUAAAACACAGUCUGUACCG<br>UCUGCGGUAUGUGGAAAGGUUAUGGCUGUAGUUGUGAUCAACUCCGCGAAC<br>CCAUGCUUCAGUCAGCUGAUGCACAAUCGUUUUUAAACGGGUUUGCGGUGU<br>AAGUGCAGCCGUCUJACACCGUGCGGCACAGGCACUAGUACUGAUGUCGU<br>AUACAGGGCUUUUGACAUCUACAUAUGAUAAAAGUAGCUGGUUUUGCUAAAUUC<br>CUAAAAACUAAUUGUUGUCGCUUCCAAGAAAAGGACGAAGAUGACAUUUUAA<br>UUGAUUCUUACUUUGUAGUUAAAGAGACACACUUUCUCUAAACUACCAACAUGA<br>AGAAACAUUUUAAUUUUACUUAAAGGAUUGUCCAGCUGUUGCUAAAACAUGAC<br>UUCUUAAAGUUUAGAAUAGACGGUGACAUUGGUACCACAUUAUACACGUCAAC<br>GUCUUACUAAAUACACA AUGGCAGACCUCGUCU                                                                                                                                                                                                |
| RdRp         | 883nt<br>(15,094 - 15,976) | AAUAGAGCUCGCACCGUAGCUGGUGUCUCUAUCUGUAGUACUAUGACCAU<br>AGACAGUUUCAUAAAAUUUUUGAAAUCAAUAGCCGCCACUAGAGGAGCUA<br>CUGUAGUAAUUGGAACAAGCAAAUUCUAUGGGUGGUUGGCACAACAUUUAAA<br>AACUGUUUAUAGUGAUGUAGAAAACCCUCACCUUUAUGGGUUGGGAUUUAUC<br>UAAAUGUGAUAGAGCCAUGCCUAAACAUGCUUAGAAUUUAUGGCCUCACUUGUU<br>CUUGCUCGCAACAUAACAACGUGUUGUAGCUUGUCACACCGUUUCUAUAGAU<br>UAGCUAAUGAGUGUGUCUCAAGUAUUAGUGAAAUGGUCAUGUGUGGCGGUU<br>CACUAUAUGUUAAACCAGGUGGAACCUCAUCAGGAGAUGCCACAACUGCUUA<br>UGCUAUJAGUGUUUUUAACAUUUGUCAAGCUGUCACGGCCAAUGUUAAUGCA<br>CUUUUAUCUACUGAUGGUAACAAAUUUGCCGAUAAAGUAUGUCCGCAUUUAC<br>AACACAGACUUUAUGAGUGUCUCUAUAGAAAUAGAGAUGUUUGACACAGACUU<br>UGUGAAUGAGUUUUACGCAUAAUUUGCGUAAACAUUUUCAAUAGAUACUC<br>UCUGACGAUGCUGUUGUGUGUUUCAAUAGCACUUUAUGCAUCUCAAGGUCUA<br>GUGGCUAGCAUAAAGAACUUUAAGUCAGUUCUUUAUUUAUCAAACAAUGUUU<br>UUAUGUCUGAAGCAAAAUGUUGGACUGAGACUGACCUUACUAAAGGACCUCA<br>UGAAUUUUGCUCUCAACAUAACAUGCUAGUUAAAACAGGGUGAUGAUUAUGUG<br>UACCUUCCUUACCCAGAUCUCAAGAAUCCUAGGGGGCCGGCUGUUUUUGUA<br>GAUG |
| nsp14        | 848nt<br>(18,447 - 19,294) | UAGUGCUAAACCACCGCCUGGAGAUCAAUUUAAAACACCUCUAUACCACUUUUG<br>UACAAAGGACUUCUUGGAAUGUAGUGCGUAUAAAGAUUGUACAAAUGUUAA<br>GUGACACACUUAAAAAUCUCUCUGACAGAGUCGUUUUUGUCUUUUGGGCACA<br>UGGCUUUGAGUUGACAUCUAUGAAGUAUUUUGUGAAAUAAGGACCUGAGCG<br>CACCUGUUGUCUAUGUGAUAGACGUGCCACAUGCUUUUCCACUGCUUCAGA<br>CACUUUAGCCUGUUGGCAUCAUUCUAUUGGAUUUGAUUACGUCUAUAAUCC<br>GUUUUAGAUUGAUGUUCACAAUUGGGGUUUUACAGGUAACCUACAAAGCAAC<br>CAUGAUCUGUAUUGUCAAGUCCUUGGUAUUGCAUUGUAGUAGUUUGUGAU<br>GCAAUCAUGACUAGGUGUCUAGCUGUCCACGAGUGCUUUUGUUAAGCGUGUU<br>GACUGGACUAUUGAAUAUCCUAUAAUUGGUGAUGAACUGAAGAUUAAUGCGG<br>CUUGUAGAAAGGUUCAACACUUGGUUGUUAAAAGCUGCAUUUUAGCAGACAA<br>AUUCCAGUUCUUCACGACAUUGGUAACCCUAAAAGCUAUUAAGUGUGUACCU<br>CAAGCUGAUGUAGAAUGGAAGUUCUAUGAUGCACAGCCUUGUAGUGACAAA<br>GCUUAUAAAUAAGAAGAAUUUUCUAUUUUUUGCCACACAUUCUGACAAA<br>UCACAGUUGGUGUAUGCCUAAUUUUGGAAUUGCAAUGCAUUGAUAUCCUG<br>CUAAUCCAUUGUUUGUAGAUUUGACACUAGAGUGCUAUCUAACCUUAAUCU<br>GCCUGGUUGUGAUGGUGGCAGUU                                             |
| Envelope (E) | 808nt<br>(26,207 - 27,116) | GCGUGCCUUUGUAAGCACAAGCUGAUGAGUACGAACUUUUGUACUCAUUCG<br>UUUCGGAAGAGACAGGUACGUUAAUAGUUAUAGCGUACUUCUUUUUCUUG<br>CUUUCGUGGUAAUUCUUGCUAGUUACACUAGCCAUCUUCUUCGCUUCGAU<br>UGUGUGCGUACUGCUGCAAUUUGUUAACGUGAGUCUUGUAAAACCUUCUU                                                                                                                                                                                                                                                                                                                                                                                                                                                                                                                                                                                                                                                                                                                                                                    |

UUUACGUUUACUCUCGUGUUAAAAUCUGAAUUCUUCUAGAGUUCUGAUCU  
UCUGGUCUAAACGAACUAAAUAUUUAUUAGUUUUUCUGUUUGGAACUUJAA  
UUUUAGCCAUGGCAGAUUCCAACGGUACUAAUACCGUUGAAGAGCUUAAAA  
GCUCCUUGAACAAUGGAACCUAGUAAUAGGUUCCUAAUCCUUACAUGGAUU  
UGUCUUCUACA AUUUGCCU AUGCCAACAGGAAUAGGUUUUUGUAUUAUUUA  
AGUUAUUUUCCUCUGGCUGUU AUGGCCAGUAACUUUAGCUUGUUUUUGUC  
UUGCUGCUGUUUACAGAAUAAUUGGAUCACCGGUGGAAUUGCUAUCGCAA  
UGGCUUGUCUUGUAGGCUUGAUGUGGCUCAGCUACUUAUUGCUUCUUUCA  
GACUUUUUGCGUACGCGUUCU AUGUGGUCAUUCAAUCCAGAAACUAAACA  
UUCUUCUCAACGUGCCACUCCAUGGCACUAAUUCUGACCAGACCGCUUCUAG  
AAAGUGAACUCGUAUCGGAGCUGUGAUCCUUCGUGGACAUCUUCGUAAUUG  
CUGGACACCAUCUAGGACGCUGUGACAUCAAGGACCUGCC

Nucleocapsid  
(N) 1363nt  
(28,068 -  
29,430)

GAAUUGUGCGUGGAUGAGGCUGGUUCUAAAUCACCCAUUCAGUACAUCGAU  
AUCGGUAAUUAUACAGUUUCCUGUUUACCUUUUJACAAUUAUUUGCCAGGAAC  
CUAAAUUGGGUAGUCUUGUAGUGCGUUGUUCGUUCUUAUGAAGACUUUUUAG  
AGUAUCAUGACGUUCGUGUUUUUAGAUUUAUCUAAAACGAACAAACUAAA  
AUGUCUGAUAAUGGACCCCAAAUACAGCGAAAUGCACCCCGCAUUACGUUUJG  
GUGGACCCUCAGAUUCAACUGGCAGUAACCAGAAUUGGAGAACGCAGUGGGG  
CGCGAUCAAACAACGUCGCCCCAAGGUUUACCCAAUAAUACUGCGUCUUG  
GUUCACCGCUCUCACUCAACAUGGCAAGGAAGACCUUAAAUCCUCGAGGA  
CAAGGCGUCCAAUUAACACCAAUAGCAGUCCAGAUACCAAAUUGGCUACU  
ACCGAAGAGCUACCAGACGAAUUCGUGGGUGGUGACGGUAAAUGAAAAGAU  
UCAGUCCAAGAUGGUAAUUCUACUACCUAGGAACUGGGCCAGAAGCUGGAC  
UUCCCUAUGGUGCUAACAAAAGACGGCAUCAUAUGGGUUGCAACUGAGGGAG  
CCUUGAAUACACCAAAAGAUCAAUUGGCACCCGCAAUCCUGCUAACAAUGC  
UGCAAUCGUGCUACAACUCCUCAAGGAACAACAUUGCCAAAAGGCUUCUAC  
GCAGAAGGGAGCAGAGGCGGCAGUCAAGCCUCUUCUGUUCUCAUCACGU  
AGUCGCAACAGUUAAGAAAUCAACUCCAGGCAGCAGUAGGGGAACUUCUC  
CUGCUAGAAUGGCUGGCAUUGGCGGUGAUGCUGCUUCUUGCUUUUGCUGCUG  
CUUGACAGAUUGAACAGCUUGAGAGCAAAAUGUCUGGUAAAAGGCCAACAAC  
AACAAAGGCCAAACUGUCACUAAGAAAUCUGCUGCUGAGGCUUCUAAGAAGCC  
UCGGCAAAAACGUACUGCCACUAAAGCAUACAAUGUAACACAAGCUUUCGGC  
AGACGUGGUCCAGAACAACCCAAAGGAAUUUUUGGGACCAGGAACUAAUCA  
GACAAGGAACUGAUUACAACA AUUGGCCGAAAUUGCACA AUUUGCCCCCAG  
CGCUUCAGCGUUCUUCGGAUUGUCGCGCAUUGGCAUGGAAGUCACACCUUC  
GGAAACGUGGUUGACCUACACAGGUGCCAUCAAAUUGGAUGACAAAGAUC  
AAAUUCAAAGAUCAAGUCAUUUUGCUGAAUAAGCAUUAUGACGCAUACAAA  
ACAUUCCACCAACAGAGCCUAAAAAGGACAAAAGAAGAAGGCUGAUGAAA  
CUCAAGCCUUAACCGCAGAGACA

---

**Supplementary Table 4:** Degenerate bases in common SARS-CoV-2 RT-qPCR assay primers and probes.

| Primer         | Degenerate base, and its purpose | Position in primer (5'-3') | Genomic position (5'-3') | Pairing base in genomes (frequency) |
|----------------|----------------------------------|----------------------------|--------------------------|-------------------------------------|
| RdRp-SARSr-F   | R, to pair with T or C           | 5                          | 15,435                   | T (992/992; 100.0%)                 |
| RdRp-SARSr-R   | <b>S, to pair with C or G</b>    | 12                         | 15,519                   | T (990/992; 99.8%)                  |
| RdRp-SARSr-R   | R, to pair with T or C           | 3                          | 15,528                   | T (992/992; 100.0%)                 |
| HKU-ORF1-F     | Y, to pair with A or G           | 6                          | 18,783                   | A (992/992; 100.0%)                 |
| HKU-ORF1-F     | R, to pair with T or C           | 12                         | 18,789                   | T (989/992; 99.7%)                  |
| HKU-ORF1-P     | W, to pair with T or A           | 13                         | 18,861                   | T (992/992; 100.0%)                 |
| HKU-ORF1-R     | R, to pair with T or C           | 4                          | 18,906                   | T (992/992; 100.0%)                 |
| 2019-nCoV_N3-P | Y, to pair with A or G           | 2                          | 28,705                   | A (992/992; 100.0%)                 |

## Supplementary File 1: Research Protocol SARS-COV-2 RT-qPCR

### Primer/probe sets [Link to CDC assay](#)

- CDC N1 (nucleocapsid)
- CDC N2
- CDC RP (RNase P)

### Reagents: [NEB Luna® Universal Probe One-Step RT-qPCR Kit](#)

#### Protocol

1. On ice, prepare a master mix containing the following (account for 10% extra lost during pipetting), *except RNA*:

| Component                                      | Volume in 20 $\mu$ L reaction                         |
|------------------------------------------------|-------------------------------------------------------|
| Luna Universal Probe One-Step Reaction Mix, 2X | 10 $\mu$ L                                            |
| Luna WarmStart® RT Enzyme Mix (20X)            | 1 $\mu$ L                                             |
| Forward Primer (10 $\mu$ M)                    | 1 $\mu$ L                                             |
| Reverse primer (10 $\mu$ M)                    | 1 $\mu$ L                                             |
| Probe (10 $\mu$ M)                             | 0.5 $\mu$ L                                           |
| Nuclease-free water                            | 1.5 $\mu$ L                                           |
| <i>RNA</i>                                     | <i>5 <math>\mu</math>L (do not add to master mix)</i> |

2. Add 15  $\mu$ L of mastermix to each designated well (on ice).
3. Add 5  $\mu$ L of sample RNA, water (no-template control), or viral RNA (positive control, e.g.  $10^3$  copies/  $\mu$ L) to each designated well (on ice).
4. Cover with plate sealer. Centrifuge to remove bubbles, if present.
5. Run the following thermocycler conditions:

| Step                                   | Temp       | Time   |
|----------------------------------------|------------|--------|
| 1                                      | 55°C       | 10 min |
| 2                                      | 95°C       | 1 min  |
| 3                                      | 95°C       | 10 sec |
| 4                                      | 55°C       | 30 sec |
| 5                                      | Read plate |        |
| Repeat steps 3-5 for <b>45</b> cycles. |            |        |

### Example plate set-up

|   |    |    |    |     |     |     |     |     |     |                     |                     |                     |
|---|----|----|----|-----|-----|-----|-----|-----|-----|---------------------|---------------------|---------------------|
|   | 1  | 2  | 3  | 4   | 5   | 6   | 7   | 8   | 9   | 10                  | 11                  | 12                  |
| A | S1 | S1 | S1 | S9  | S9  | S9  | S17 | S17 | S17 | S25                 | S25                 | S25                 |
| B | S2 | S2 | S2 | S10 | S10 | S10 | S18 | S18 | S18 | S26                 | S26                 | S26                 |
| C | S3 | S3 | S3 | S11 | S11 | S11 | S19 | S19 | S19 | S27                 | S27                 | S27                 |
| D | S4 | S4 | S4 | S12 | S12 | S12 | S20 | S20 | S20 | S28                 | S28                 | S28                 |
| E | S5 | S5 | S5 | S13 | S13 | S13 | S21 | S21 | S21 | NEC                 | NEC                 | NEC                 |
| F | S6 | S6 | S6 | S14 | S14 | S14 | S22 | S22 | S22 | NTC                 | NTC                 | NTC                 |
| G | S7 | S7 | S7 | S15 | S15 | S15 | S23 | S23 | S23 | RNA 10 <sup>3</sup> | RNA 10 <sup>3</sup> | RNA 10 <sup>3</sup> |
| H | S8 | S8 | S8 | S16 | S16 | S16 | S24 | S24 | S24 | RNA 10 <sup>3</sup> | RNA 10 <sup>3</sup> | RNA 10 <sup>3</sup> |
|   | N1 | N2 | RP | N1  | N2  | RP  | N1  | N2  | RP  | N1                  | N2                  | RP                  |

Sx = Sample RNA, NEC = Negative Extraction Control, NTC = Negative Template Control, RNA 10<sup>3</sup> = SARS-CoV-2 RNA at 10<sup>3</sup> GE/μL.

## References

1. Corman, V. M. *et al.* Detection of 2019 novel coronavirus (2019-nCoV) by real-time RT-PCR. *Euro Surveill.* **25**, (2020).
2. Chu, D. K. W. *et al.* Molecular Diagnosis of a Novel Coronavirus (2019-nCoV) Causing an Outbreak of Pneumonia. *Clin. Chem.* (2020) doi:10.1093/clinchem/hvaa029.
3. Institute of Viral Diseases. China CDC. National Institute for Viral Disease Control and Prevention. [http://ivdc.chinacdc.cn/kyjz/202001/t20200121\\_211337.html](http://ivdc.chinacdc.cn/kyjz/202001/t20200121_211337.html) (2020).
4. CDC. Coronavirus Disease 2019 (COVID-19). *Centers for Disease Control and Prevention* <https://www.cdc.gov/coronavirus/2019-ncov/lab/rt-pcr-panel-primer-probes.html> (2020).
